# Supplementary material for: Dissecting peri-implantation development using cultured human embryos and embryo-like assembloids
Source: PubMed Central journal article supplement (PMC10474050; doi:10.1038/s41422-023-00846-8), 2023-07-17
Supplement: 41422_2023_846_MOESM8_ESM.pdf [file 41422_2023_846_MOESM8_ESM.pdf]

**Supplementary information, Table S1: Primer and sgRNA information**

| <b>Primer name</b>                    | <b>Primer sequences</b>      |
|---------------------------------------|------------------------------|
| genotyping human <i>BMP4</i> Forward  | 5'-cccagagacaccatgattcc-3'   |
| genotyping human <i>BMP4</i> Reversed | 5'-cccagagacaccatgattcc-3'   |
| genotyping human <i>BMP7</i> Forward  | 5'-ccctgcgtgtatctctttgtag-3' |
| genotyping human <i>BMP7</i> Reversed | 5'-gggaagcctgtttgtagttaa-3'  |
| <b>sgRNA name</b>                     | <b>sgRNA sequences</b>       |
| <i>BMP4</i> sgRNA1                    | 5'-gaaaaaagtcgccgagattc-3'   |
| <i>BMP4</i> sgRNA2                    | 5'-cacgcgggaggacgccgctc-3'   |
| <i>BMP7</i> sgRNA1                    | 5'-gctcgacagccgtaccctct-3'   |
