# Supplementary material for: Dissecting peri-implantation development using cultured human embryos and embryo-like assembloids
Source: PubMed Central journal article supplement (PMC10474050; doi:10.1038/s41422-023-00846-8), 2023-07-17
Supplement: 41422_2023_846_MOESM9_ESM.pdf [file 41422_2023_846_MOESM9_ESM.pdf]

**Supplementary information, Table S2: Antibody information**

| <b>Antibody (species/isotype)</b> | <b>Source</b>             | <b>Cat#</b> | <b>Dilution</b> |
|-----------------------------------|---------------------------|-------------|-----------------|
| TFCP2L1 (goat IgG)                | R&D Systems               | AF5726      | 1:500           |
| KLF17 (rabbit IgG)                | Atlas Antibodies          | HPA024629   | 1:500           |
| KLF4 (rabbit IgG)                 | Millipore                 | 09-821      | 1:600           |
| NANOG (goat IgG)                  | R&D Systems               | AF1997      | 1:400           |
| SOX2 (rabbit IgG)                 | Millipore                 | AB5603      | 1:600           |
| OCT4 (mouse IgG)                  | Santa Cruz                | sc-5279     | 1:600           |
| N-Cadherin (rabbit IgG)           | GeneTex                   | GTX127345   | 1:400           |
| COL3A1 (rabbit IgG)               | Abcam                     | Ab7778      | 1:400           |
| PRDM14 (rabbit IgG)               | Millipore                 | AB4350      | 1:200           |
| ALPPL2 (rabbit IgG) <sup>1</sup>  | Made in-house (Gao Lab)   | N/A         | N/A             |
| $\beta$ -catenin (rabbit IgG)     | Cell Signaling Technology | 8480        | 1:200           |
| Tra-1-60 (mouse IgM)              | Millipore                 | SCR001      | 1:200           |
| E-Cadherin (mouse IgG)            | Abcam                     | ab76055     | 1:200           |
| BST2 (rabbit IgG)                 | Abcam                     | ab243230    | 1:200           |
| SUSD2-PE (mouse IgG)              | Biologend                 | 327406      | 1:200           |
| Tra-1-85/CD147 (rabbit IgG)       | Abcam                     | ab108308    | 1:200           |
| GATA6 (goat IgG)                  | R&D Systems               | AF1700      | 1:600           |
| GATA6 (rabbit IgG)                | Cell Signaling Technology | 5851T       | 1:600           |
| SOX17 (goat IgG)                  | R&D Systems               | AF1924      | 1:600           |
| SOX17 (rabbit IgG)                | Cell Signaling Technology | 81778       | 1:500           |
| GATA4 (goat IgG)                  | Santa Cruz                | sc-1237     | 1:100           |
| OTX2 (goat IgG)                   | R&D Systems               | AF1979      | 1:400           |
| FOXA2 (goat IgG)                  | Santa Cruz                | sc-6554     | 1:200           |
| CDX2 (rabbit IgG)                 | Abcam                     | ab76541     | 1:400           |
| CK7/KRT7 (rabbit IgG)             | Abcam                     | ab181598    | 1:500           |
| GATA3 (mouse IgG)                 | Thermo Fisher Scientific  | MA1-028     | 1:500           |
| P63 (mouse IgG)                   | Abcam                     | ab735       | 1:100           |
| TEAD4 (rabbit IgG)                | Atlas Antibodies          | HPA056896   | 1:200           |
| TFAP2C (mouse IgG)                | Santa Cruz                | sc-12762    | 1:400           |
| HLA-G (mouse IgG)                 | Abcam                     | ab52455     | 1:200           |
| hCG- $\beta$ (mouse IgG)          | Abcam                     | ab9582      | 1:200           |
| ZO-1 (mouse IgG)                  | Thermo Fisher Scientific  | 33-9100     | 1:100           |
| Brachyury/T (goat IgG)            | R&D Systems               | AF2085      | 1:600           |
| PODXL1 (mouse IgG)                | R&D Systems               | MAB1658     | 1:600           |
| EOMES (mouse IgG)                 | R&D Systems               | MAB6166     | 1:200           |
| TFAP2A (mouse IgG)                | Santa Cruz                | sc-12726    | 1:400           |
| LAMININ (rabbit IgG)              | Sigma Aldrich             | L9393       | 1:100           |
| SNAIL (goat IgG)                  | R&D Systems               | AF-3639     | 1:400           |

|                                        |                           |             |        |
|----------------------------------------|---------------------------|-------------|--------|
| VIMENTIN (mouse IgG)                   | eBioscience               | 14-9897     | 1:2000 |
| CER1 (rabbit IgG)                      | Sigma Aldrich             | HPA019917   | 1:100  |
| LEFTY1 (goat IgG)                      | R&D Systems               | AF746       | 1:500  |
| BLIMP1 (rabbit IgG)                    | Cell Signaling Technology | 9115S       | 1:100  |
| SSEA4 (mouse IgG)                      | Millipore                 | SCR001      | 1:100  |
| CD24 (mouse IgG)                       | Abcam                     | ab134375    | 1:100  |
| FOXA1 (mouse IgG)                      | Abcam                     | ab55178     | 1:100  |
| COL6A1 (rabbit IgG)                    | Abcam                     | ab182744    | 1:400  |
| KDR (goat IgG)                         | R&D Systems               | AF357       | 1:400  |
| Alexa Fluor 488 donkey anti-rabbit IgG | Jackson ImmunoResearch    | 711-545-152 | 1:600  |
| Alexa Fluor 488 goat anti-mouse IgM    | Thermo Fisher Scientific  | A-21042     | 1:600  |
| Alexa Fluor 568 donkey anti-mouse IgG  | Thermo Fisher Scientific  | A-10037     | 1:600  |
| Alexa Fluor 488 donkey anti-mouse IgG  | Thermo Fisher Scientific  | A-21202     | 1:600  |
| Alexa Fluor 647 donkey anti-rabbit IgG | Thermo Fisher Scientific  | A-31573     | 1:600  |
| Alexa Fluor 555 donkey anti-rabbit IgG | Thermo Fisher Scientific  | A-31572     | 1:600  |
| Alexa Fluor 647 donkey anti-goat IgG   | Thermo Fisher Scientific  | A-21447     | 1:600  |
| Alexa Fluor 488 donkey anti-goat IgG   | Thermo Fisher Scientific  | A-11055     | 1:600  |

## Reference

- 1 Bi, Y. *et al.* Identification of ALPPL2 as a Naive Pluripotent State-Specific Surface Protein Essential for Human Naive Pluripotency Regulation. *Cell Rep* **30**, 3917-3931 e3915, doi:10.1016/j.celrep.2020.02.090 (2020).
